# Supplementary material for: Development of an iron-selective antioxidant probe with protective effects on neuronal function
Source: PubMed Central journal article supplement (PMC5724820; doi:10.1371/journal.pone.0189043), 2017-12-11
Supplement: pone.0189043.s001.pdf [file pone.0189043.s001.pdf]

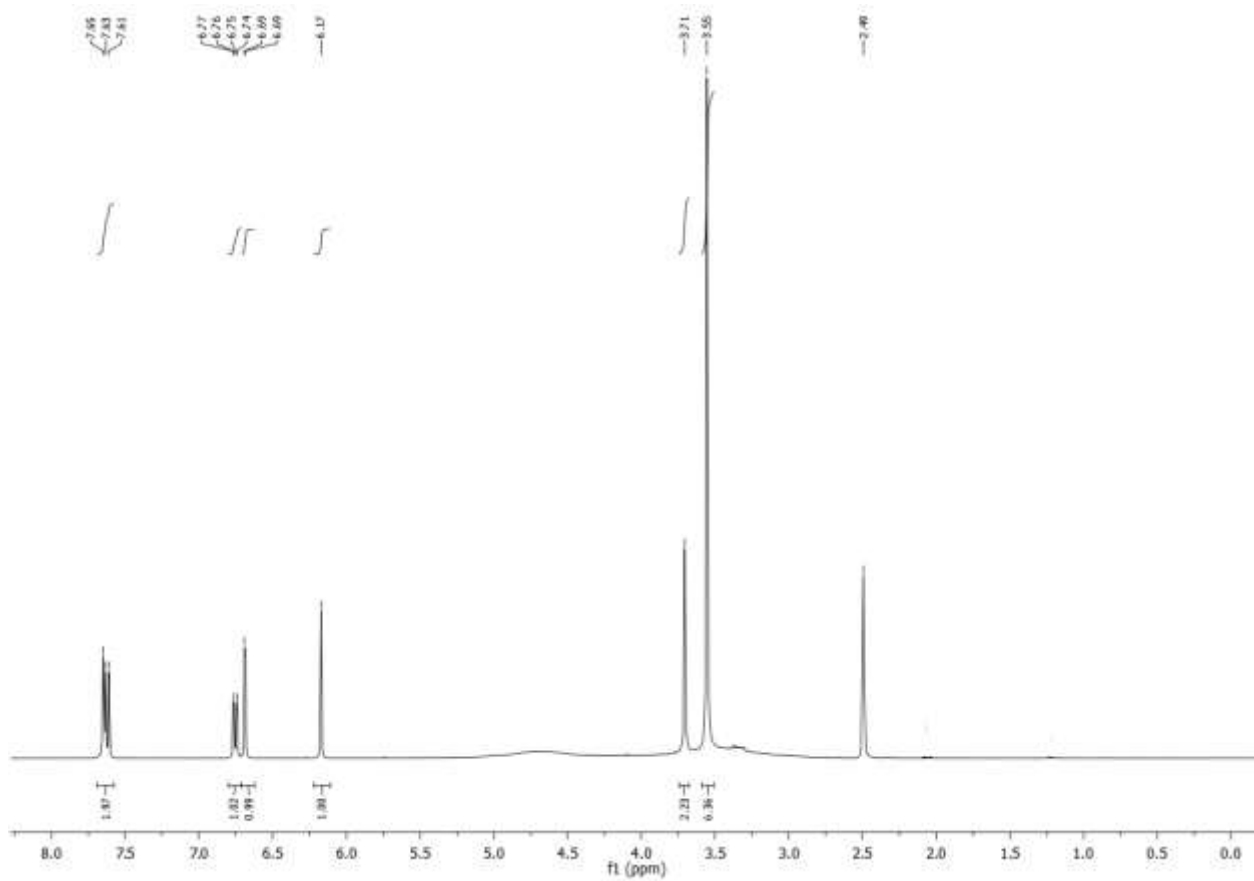

**S1A Fig. Spectral properties of CT51. <sup>1</sup>H-NMR spectrum.**

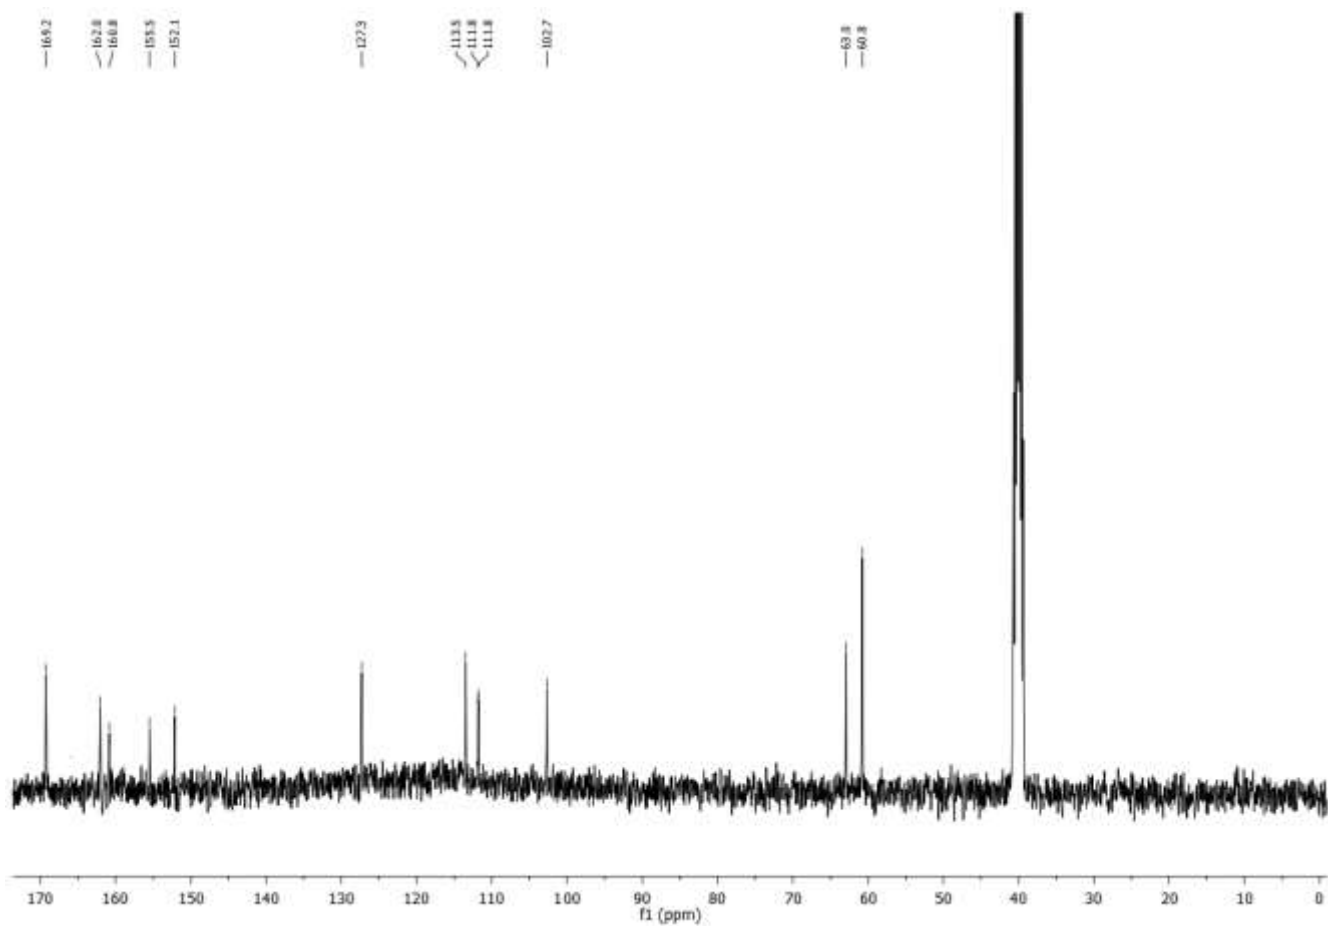

S1B Fig. Spectral properties of CT51.  $^{13}\text{C}$ -NMR spectrum.

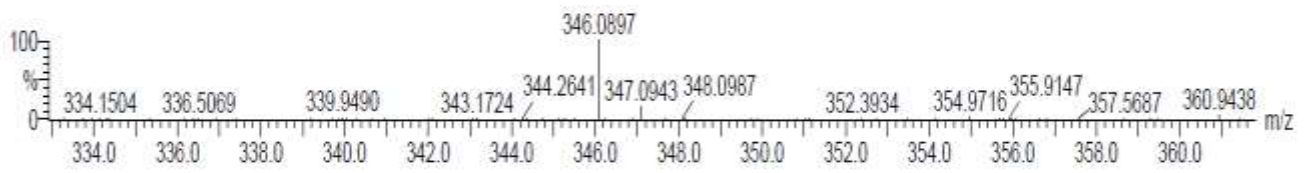

Minimum: -1.5  
 Maximum: 5.0 5.0 50.0

| Mass     | Calc. Mass | mDa  | PPM  | DBE | i-FIT | i-FIT (Norm) | Formula         |
|----------|------------|------|------|-----|-------|--------------|-----------------|
| 346.0897 | 346.0903   | -0.6 | -1.7 | 7.5 | 16.0  | 0.0          | C15 H17 N O7 Na |

**S1C Fig. Spectral properties of CT51. ESI-MS analysis.**

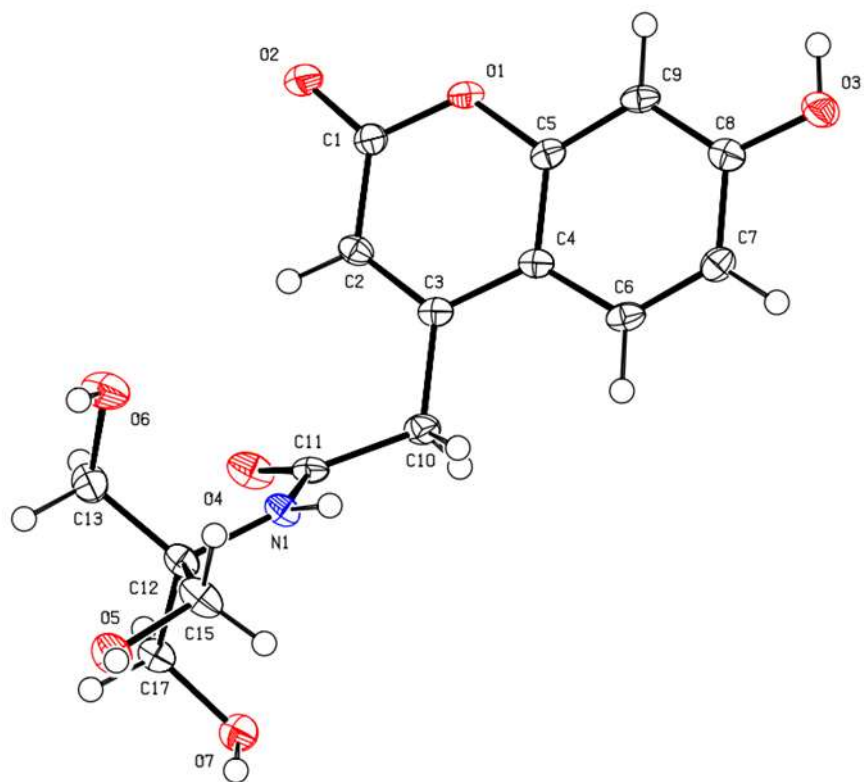

**S1D Fig. Crystal structure of CT51.**
