# Supplementary material for: Development of an iron-selective antioxidant probe with protective effects on neuronal function
Source: PubMed Central journal article supplement (PMC5724820; doi:10.1371/journal.pone.0189043), 2017-12-11
Supplement: pone.0189043.s002.pdf [file pone.0189043.s002.pdf]

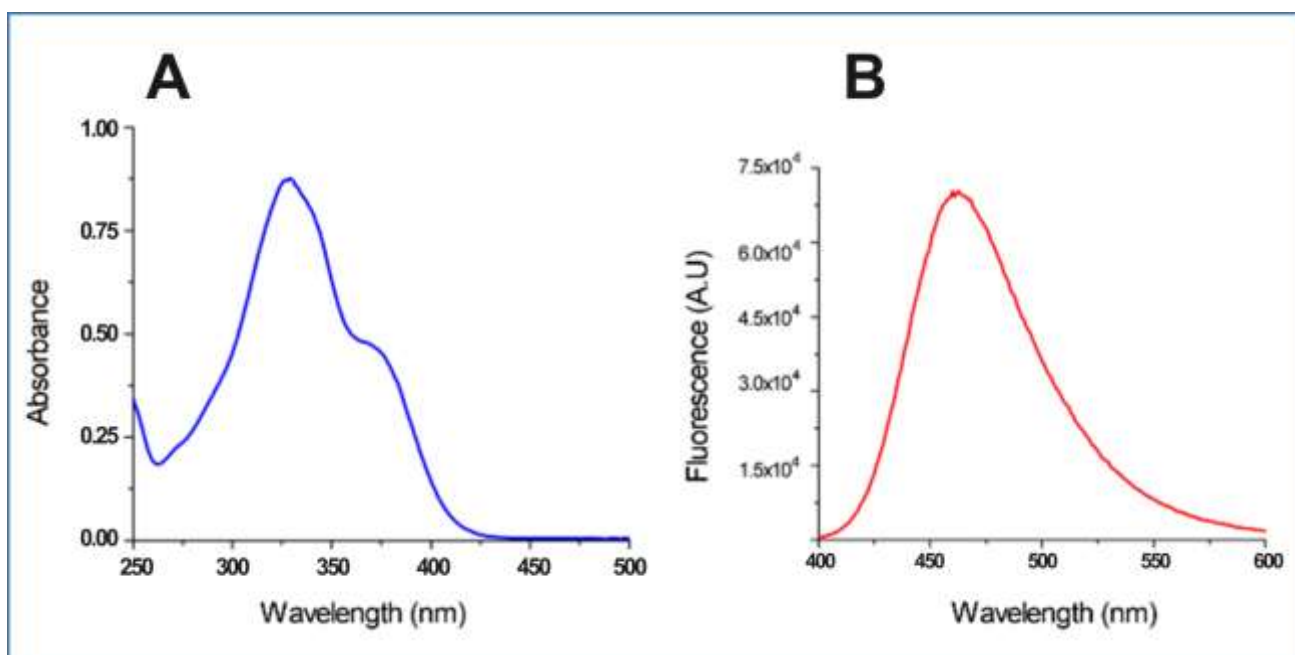

S2 Fig. (A) Absorption spectra and (B) emission spectra of CT51.
