# Supplementary material for: Development of an iron-selective antioxidant probe with protective effects on neuronal function
Source: PubMed Central journal article supplement (PMC5724820; doi:10.1371/journal.pone.0189043), 2017-12-11
Supplement: pone.0189043.s004.pdf [file pone.0189043.s004.pdf]

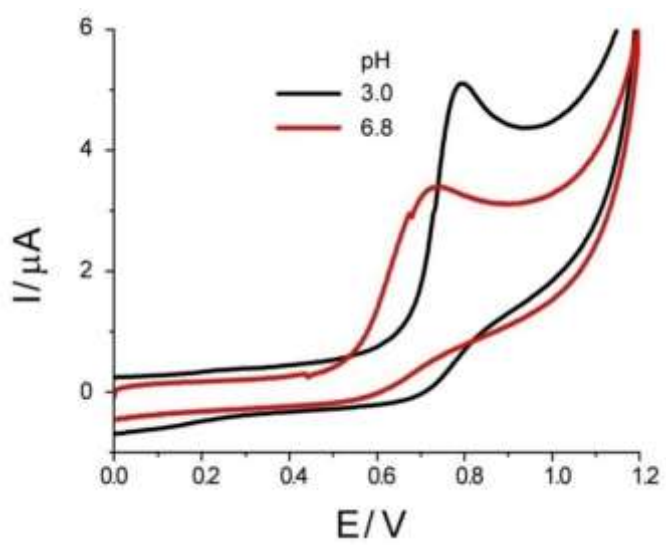

**S4 Fig. Voltammograms of CT51.**
