# Supplementary material for: Development of an iron-selective antioxidant probe with protective effects on neuronal function
Source: PubMed Central journal article supplement (PMC5724820; doi:10.1371/journal.pone.0189043), 2017-12-11
Supplement: pone.0189043.s006.pdf [file pone.0189043.s006.pdf]

**S1 Appendix. Stern-Volmer equation, Benesi-Hildebrand equation and equation used to calculate fluorescence quantum yield.**

(A) Stern-Volmer equation

$$\frac{I^0}{I} = 1 + K_{sv} [Q]$$

In this equation,  $K_{sv}$  is the Stern-Volmer constant, which is related to the accessibility of the fluorophore to the quencher (better accessibility, higher  $K_{sv}$ ); when the extinction is collisional (dynamic), the value of this constant is equal to the product of the reaction rate constant ( $K_q$ ) between the excited state and the quencher and the fluorophore lifetime ( $\tau_0$ ).

(B) Fluorescence intensity data for the CT51- $Fe^{2+}$  complex were plotted according to the Benesi-Hildebrand equation:

$$\frac{1}{F - F_0} = \frac{1}{(F_{max} - F_0) [Fe^{2+}]} + \frac{1}{F_{max} - F_0}$$

In this equation,  $K_a$  is the stability constant for 1:1 complex formation;  $F_0$  is the fluorescence intensity of the sensor at 460 nm (with  $\lambda$  excitation 329 nm) in the absence of  $Fe^{2+}$ .  $F$  is the observed fluorescence intensity at 460 nm as a function of varying  $Fe^{2+}$  concentration and  $F_{max}$ , the maximal fluorescence intensity measured at 460 nm in the presence of  $Fe^{2+}$ . Values for the y-axis intercept and the slope were, respectively,  $(-1.02 \pm 0.30) \times 10^{-6}$  and  $(-6.76 \pm 0.20) \times 10^{-9}$  M.

(C) Calculation of fluorescence quantum yield.

$$\Phi_S = \Phi_r \left( \frac{A_r F_s}{A_s F_r} \right) \left( \frac{\eta_s^2}{\eta_r^2} \right)$$

The fluorescence quantum yield ( $\Phi$ ) was determined using quinine sulfate dissolved in 0.5 M H<sub>2</sub>SO<sub>4</sub> ( $\Phi_r = 0.546$ ) as standard. The subscripts s and r in this equation denote sample and reference, respectively. A is absorbance at the excitation wavelength (very dilute solutions), F is the integrated fluorescence intensity, and  $\eta$  is the refractive index of the medium.
