# Supplementary material for: Development of an iron-selective antioxidant probe with protective effects on neuronal function
Source: PubMed Central journal article supplement (PMC5724820; doi:10.1371/journal.pone.0189043), 2017-12-11
Supplement: pone.0189043.s007.pdf [file pone.0189043.s007.pdf]

## S1 Table

### Crystal data and details of the structure determination (1-4)

---

#### Crystal data

|                                                                          |                               |
|--------------------------------------------------------------------------|-------------------------------|
| 2 (C <sub>15</sub> H <sub>17</sub> N O <sub>7</sub> ), CH <sub>4</sub> O | $\delta = 86.298(3)^\circ$    |
| $M_r = 678.63$                                                           | $V = 1518.6(2) \text{ \AA}^3$ |
| Triclinic, P-1 (N <sup>o</sup> 2)                                        | $Z = 2$                       |
| $a = 7.7008(6) \text{ \AA}$                                              | MoK $\alpha$ radiation        |
| $b = 13.8964(11) \text{ \AA}$                                            | $\mu = 0.119 \text{ mm}^{-1}$ |
| $c = 15.3172(13) \text{ \AA}$                                            | $T = 100 \text{ K}$           |
| $\alpha = 68.684(3)^\circ$                                               | 0.03 x 0.12 x 0.12 mm         |
| $\beta = 84.244(3)^\circ$                                                |                               |

#### Data collection

|                              |                                        |
|------------------------------|----------------------------------------|
| Bruker-Nonius diffractometer | 5042 reflections with $I > 2\sigma(I)$ |
| 6881 measured reflections    | $R_{\text{int}} = 0.113$               |
| 6881 independent reflections | Theta min-max (deg) 1.6-27.6           |

#### Refinement

|                                     |                                                      |
|-------------------------------------|------------------------------------------------------|
| $R [(F^2 > 2\sigma(F^2))] = 0.0654$ | H-atom parameters constrained                        |
| $wR(F^2) = 0.1852$                  | 444 parameters                                       |
| $S = 1.06$                          | $\Delta\rho_{\text{max}} = 0.75 \text{ e \AA}^{-3}$  |
| $F(000) = 716$                      | $\Delta\rho_{\text{min}} = -0.42 \text{ e \AA}^{-3}$ |

- 
1. SMART, SAINTPLUS V6.02, SHELXTL V6.10 and SADABS; Bruker Analytical X-ray Instruments Inc., Madison, Wisconsin, USA.
  2. G. M. Sheldrick, 1997. SHELXL-97. Program for the Refinement of Crystal Structures. University of Göttingen, Germany.
  3. K. Brandenburg, DIAMOND. Visual Crystal Structure Information System. Version 2.1e Crystal Impact GbR, Bonn, Germany, 1999.
  4. A. L. Spek, *J. Appl. Cryst.*, 36: 7-13, 2003
